# Supplementary material for: Influence of substrate orientation on tadpoles' feeding efficiency
Source: PubMed Central journal article supplement (PMC6361219; doi:10.1242/bio.037598), 2018-12-21
Supplement: biolopen-8-037598-s1.pdf [file biolopen-8-037598-s1.pdf]

**Table S1.** Mean  $\pm$  standard deviation (s.d.) of measurements, relative and absolute growth of species.

| Species               | Treatment | n  | Measurements     |                                    |                                    |                                      | Relative (%)                          |                                   | Absolute                          |                                   |
|-----------------------|-----------|----|------------------|------------------------------------|------------------------------------|--------------------------------------|---------------------------------------|-----------------------------------|-----------------------------------|-----------------------------------|
|                       |           |    | Body size (mm)   |                                    | Weight (mg)                        |                                      | Body size                             | Weight                            | Body size (mm)                    | Weight (mg)                       |
|                       |           |    | Initial          | Final                              | Initial                            | Final                                | Mean $\pm$ s.d.                       | Mean $\pm$ s.d.                   | Mean $\pm$ s.d.                   | Mean $\pm$ s.d.                   |
| <i>T. typhonus</i>    | 0°        | 11 | 12.03 $\pm$ 0.63 | 15.31 $\pm$ 1.15                   | 286.76 $\pm$ 40.51                 | 644.89 $\pm$ 88.85                   | 0.27 $\pm$ 0.10                       | 1.26 $\pm$ 0.28                   | 3.30 $\pm$ 1.20                   | 358.10 $\pm$ 74.30                |
|                       | 45°       | 9  | 12.24 $\pm$ 1.03 | 15.06 $\pm$ 1.23                   | 276.61 $\pm$ 52.05                 | 601.58 $\pm$ 111.27                  | 0.23 $\pm$ 0.10                       | 1.20 $\pm$ 0.42                   | 2.80 $\pm$ 1.20                   | 324.90 $\pm$ 93.50                |
|                       | 90°       | 11 | 12.30 $\pm$ 1.12 | 14.16 $\pm$ 0.97                   | 284.89 $\pm$ 63.06                 | 565.10 $\pm$ 110.62                  | 0.15 $\pm$ 0.07                       | 1.00 $\pm$ 0.26                   | 1.90 $\pm$ 0.80                   | 280.20 $\pm$ 70.60                |
|                       | 135°      | 11 | 11.84 $\pm$ 1.03 | 14.38 $\pm$ 0.77                   | 268.82 $\pm$ 54.32                 | 534.76 $\pm$ 87.19                   | 0.21 $\pm$ 0.07                       | 1.02 $\pm$ 0.32                   | 2.50 $\pm$ 0.70                   | 265.90 $\pm$ 76.20                |
|                       | 180°      | 11 | 11.99 $\pm$ 0.57 | 14.68 $\pm$ 1.29                   | 268.99 $\pm$ 43.23                 | 564.85 $\pm$ 130.58                  | 0.22 $\pm$ 0.09                       | 1.09 $\pm$ 0.38                   | 2.70 $\pm$ 1.10                   | 295.90 $\pm$ 106.40               |
|                       |           |    |                  | <b>12.08 <math>\pm</math> 0.88</b> | <b>14.72 <math>\pm</math> 1.08</b> | <b>277.21 <math>\pm</math> 50.63</b> | <b>582.24 <math>\pm</math> 105.70</b> | <b>0.22 <math>\pm</math> 0.09</b> | <b>1.11 <math>\pm</math> 0.33</b> | <b>2.60 <math>\pm</math> 1.00</b> |
| <i>D. minutus</i>     | 0°        | 11 | 10.77 $\pm$ 0.96 | 11.80 $\pm$ 0.69                   | 64.65 $\pm$ 11.73                  | 356.03 $\pm$ 45.14                   | 0.10 $\pm$ 0.08                       | 4.75 $\pm$ 1.64                   | 1.00 $\pm$ 0.70                   | 291.30 $\pm$ 51.20                |
|                       | 45°       | 10 | 10.09 $\pm$ 0.77 | 11.22 $\pm$ 1.08                   | 89.39 $\pm$ 14.81                  | 268.90 $\pm$ 68.43                   | 0.11 $\pm$ 0.05                       | 2.03 $\pm$ 0.62                   | 1.10 $\pm$ 0.60                   | 179.50 $\pm$ 62.10                |
|                       | 90°       | 11 | 10.31 $\pm$ 1.11 | 11.35 $\pm$ 1.22                   | 70.88 $\pm$ 17.08                  | 287.67 $\pm$ 61.30                   | 0.10 $\pm$ 0.07                       | 3.22 $\pm$ 1.21                   | 1.00 $\pm$ 0.70                   | 216.80 $\pm$ 57.80                |
|                       | 135°      | 11 | 11.05 $\pm$ 0.82 | 12.06 $\pm$ 0.99                   | 73.90 $\pm$ 14.50                  | 320.15 $\pm$ 64.49                   | 0.09 $\pm$ 0.08                       | 3.48 $\pm$ 1.33                   | 1.00 $\pm$ 0.80                   | 246.20 $\pm$ 65.50                |
|                       | 180°      | 11 | 10.16 $\pm$ 0.96 | 11.37 $\pm$ 0.94                   | 61.68 $\pm$ 17.17                  | 293.06 $\pm$ 66.84                   | 0.12 $\pm$ 0.06                       | 4.02 $\pm$ 1.68                   | 1.20 $\pm$ 0.60                   | 231.40 $\pm$ 65.40                |
|                       |           |    |                  | <b>10.48 <math>\pm</math> 0.92</b> | <b>11.56 <math>\pm</math> 0.98</b> | <b>72.10 <math>\pm</math> 15.06</b>  | <b>305.16 <math>\pm</math> 61.24</b>  | <b>0.10 <math>\pm</math> 0.07</b> | <b>3.50 <math>\pm</math> 1.30</b> | <b>1.00 <math>\pm</math> 0.70</b> |
| <i>S. fuscovarius</i> | 0°        | 9  | 7.71 $\pm$ 0.61  | 9.93 $\pm$ 0.80                    | 124.83 $\pm$ 37.93                 | 241.63 $\pm$ 41.12                   | 0.29 $\pm$ 0.08                       | 1.00 $\pm$ 0.37                   | 2.20 $\pm$ 0.60                   | 116.80 $\pm$ 28.70                |
|                       | 45°       | 10 | 8.56 $\pm$ 0.51  | 10.35 $\pm$ 0.90                   | 162.94 $\pm$ 28.57                 | 308.00 $\pm$ 79.81                   | 0.20 $\pm$ 0.07                       | 0.88 $\pm$ 0.32                   | 1.80 $\pm$ 0.70                   | 145.00 $\pm$ 61.10                |
|                       | 90°       | 8  | 8.73 $\pm$ 0.63  | 10.20 $\pm$ 0.99                   | 149.39 $\pm$ 38.57                 | 270.63 $\pm$ 86.79                   | 0.16 $\pm$ 0.07                       | 0.79 $\pm$ 0.21                   | 1.40 $\pm$ 0.70                   | 121.20 $\pm$ 51.40                |
|                       | 135°      | 9  | 8.07 $\pm$ 0.52  | 9.53 $\pm$ 1.05                    | 139.03 $\pm$ 20.32                 | 228.04 $\pm$ 58.05                   | 0.18 $\pm$ 0.11                       | 0.64 $\pm$ 0.32                   | 1.40 $\pm$ 0.90                   | 89.00 $\pm$ 48.80                 |
|                       | 180°      | 10 | 7.56 $\pm$ 0.53  | 9.53 $\pm$ 0.82                    | 115.71 $\pm$ 11.99                 | 224.02 $\pm$ 45.92                   | 0.26 $\pm$ 0.12                       | 0.93 $\pm$ 0.30                   | 1.90 $\pm$ 0.90                   | 108.30 $\pm$ 39.90                |
|                       |           |    |                  | <b>8.13 <math>\pm</math> 0.56</b>  | <b>9.91 <math>\pm</math> 0.91</b>  | <b>138.38 <math>\pm</math> 27.48</b> | <b>254.46 <math>\pm</math> 62.34</b>  | <b>0.22 <math>\pm</math> 0.09</b> | <b>0.85 <math>\pm</math> 0.30</b> | <b>1.70 <math>\pm</math> 0.70</b> |
| <i>L. fuscus</i>      | 0°        | 9  | 9.37 $\pm$ 0.53  | 11.41 $\pm$ 0.63                   | 134.11 $\pm$ 19.22                 | 293.41 $\pm$ 61.36                   | 0.21 $\pm$ 0.33                       | 1.18 $\pm$ 0.07                   | 2.00 $\pm$ 0.60                   | 159.30 $\pm$ 50.10                |
|                       | 45°       | 11 | 9.62 $\pm$ 0.43  | 11.32 $\pm$ 0.73                   | 152.75 $\pm$ 21.84                 | 298.90 $\pm$ 33.57                   | 0.17 $\pm$ 0.19                       | 0.97 $\pm$ 0.05                   | 1.70 $\pm$ 0.50                   | 146.10 $\pm$ 22.70                |
|                       | 90°       | 9  | 9.55 $\pm$ 0.81  | 11.36 $\pm$ 0.58                   | 144.48 $\pm$ 34.53                 | 291.24 $\pm$ 61.02                   | 0.19 $\pm$ 0.57                       | 1.08 $\pm$ 0.08                   | 1.80 $\pm$ 0.70                   | 146.80 $\pm$ 53.30                |

|                   |      |    |                    |                     |                       |                       |                    |                    |                    |                       |
|-------------------|------|----|--------------------|---------------------|-----------------------|-----------------------|--------------------|--------------------|--------------------|-----------------------|
|                   | 135° | 10 | 9.35 ± 0.57        | 11.32 ± 0.58        | 145.15 ± 27.38        | 285.54 ± 45.98        | 0.21 ± 0.16        | 0.98 ± 0.06        | 1.90 ± 0.60        | 140.40 ± 25.50        |
|                   | 180° | 9  | 9.58 ± 0.48        | 11.92 ± 0.52        | 143.18 ± 15.00        | 324.16 ± 40.90        | 0.24 ± 0.35        | 1.28 ± 0.07        | 2.30 ± 0.60        | 180.90 ± 40.40        |
|                   |      |    | <b>9.49 ± 0.56</b> | <b>11.47 ± 0.61</b> | <b>143.93 ± 23.59</b> | <b>298.65 ± 48.57</b> | <b>0.20 ± 0.32</b> | <b>1.10 ± 0.07</b> | <b>1.90 ± 0.60</b> | <b>154.90 ± 38.40</b> |
|                   | 0°   | 12 | 7.93 ± 0.73        | 8.62 ± 0.77         | 103.93 ± 22.91        | 156.53 ± 32.22        | 0.09 ± 0.06        | 0.53 ± 0.29        | 0.70 ± 0.40        | 52.60 ± 21.50         |
|                   | 45°  | 11 | 7.62 ± 0.49        | 8.27 ± 0.39         | 100.55 ± 19.95        | 148.36 ± 22.33        | 0.08 ± 0.04        | 0.49 ± 0.17        | 0.60 ± 0.30        | 47.80 ± 14.90         |
| <i>P. cuvieri</i> | 90°  | 12 | 7.86 ± 0.76        | 8.66 ± 0.71         | 105.94 ± 21.32        | 165.11 ± 28.49        | 0.10 ± 0.06        | 0.58 ± 0.19        | 0.80 ± 0.60        | 59.10 ± 14.70         |
|                   | 135° | 11 | 7.42 ± 0.65        | 7.96 ± 0.35         | 92.94 ± 19.17         | 123.56 ± 14.08        | 0.07 ± 0.05        | 0.36 ± 0.18        | 0.50 ± 0.30        | 30.60 ± 11.50         |
|                   | 180° | 12 | 7.38 ± 0.45        | 7.93 ± 0.51         | 90.87 ± 17.64         | 120.23 ± 26.68        | 0.07 ± 0.06        | 0.32 ± 0.16        | 0.50 ± 0.50        | 29.30 ± 15.60         |
|                   |      |    | <b>7.64 ± 0.62</b> | <b>8.29 ± 0.55</b>  | <b>98.84 ± 20.20</b>  | <b>142.76 ± 24.76</b> | <b>0.08 ± 0.05</b> | <b>0.46 ± 0.20</b> | <b>0.60 ± 0.40</b> | <b>43.80 ± 15.60</b>  |

Measures of weight and body size were taken on the first day of the experiment before releasing the tadpoles into the aquaria (Initial), and on the seventh day, at the end of the experiment (Final). Relative growth was calculated as Eqn1. Absolute growth was calculated as the difference between the initial and final measures of tadpoles. Values in bold represent mean and s.d. for the species, considering all orientations. n: number of tadpoles by treatment.
